# Supplementary material for: Experimental demonstration of necessary conditions for X-ray induced synthesis of cesium superoxide
Source: Royal Society of Chemistry journal article supplement (doi:10.1039/d2cp04767e), 2022-12-15
Supplement: d2cp04767e1.pdf [file d2cp04767e1.pdf]

### Supporting information

## Experimental demonstration of necessary conditions for X-ray induced synthesis of cesium superoxide

Egor Evlyukhin,<sup>\*a</sup> Petrika Cifligu,<sup>a</sup> Michael Pravica,<sup>a</sup> Pradip K. Bhowmik,<sup>b</sup> Eunja Kim,<sup>c</sup> Dmitry Popov,<sup>d</sup> and Changyong Park<sup>d</sup>

<sup>a</sup>Department of Physics and Astronomy, University of Nevada Las Vegas, Las Vegas, NV 89154, USA

<sup>b</sup>Department of Chemistry and Biochemistry, University of Nevada Las Vegas, Las Vegas, NV 89154, USA

<sup>c</sup>Department of Physics, The University of Texas at El Paso, El Paso, TX 79968, USA

<sup>d</sup>High Pressure Collaborative Access Team (HPCAT), X-Ray Science Division, Argonne National Laboratory, Lemont, IL 60439, USA.

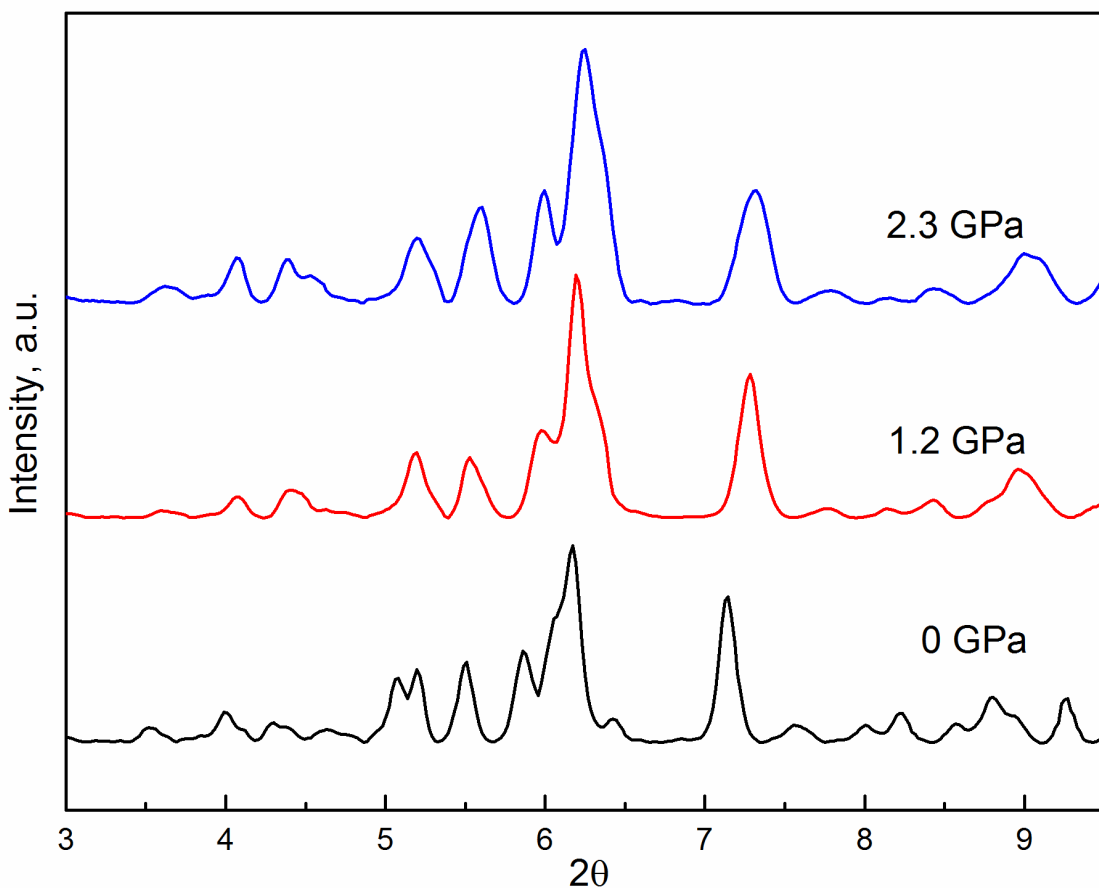

**Figure. S1.** XRD patterns of cesium oxalate (Cs<sub>2</sub>C<sub>2</sub>O<sub>4</sub>) at ambient pressure, 1.2 GPa and 2.3 GPa after 1 min of X-ray irradiation at 36 keV.

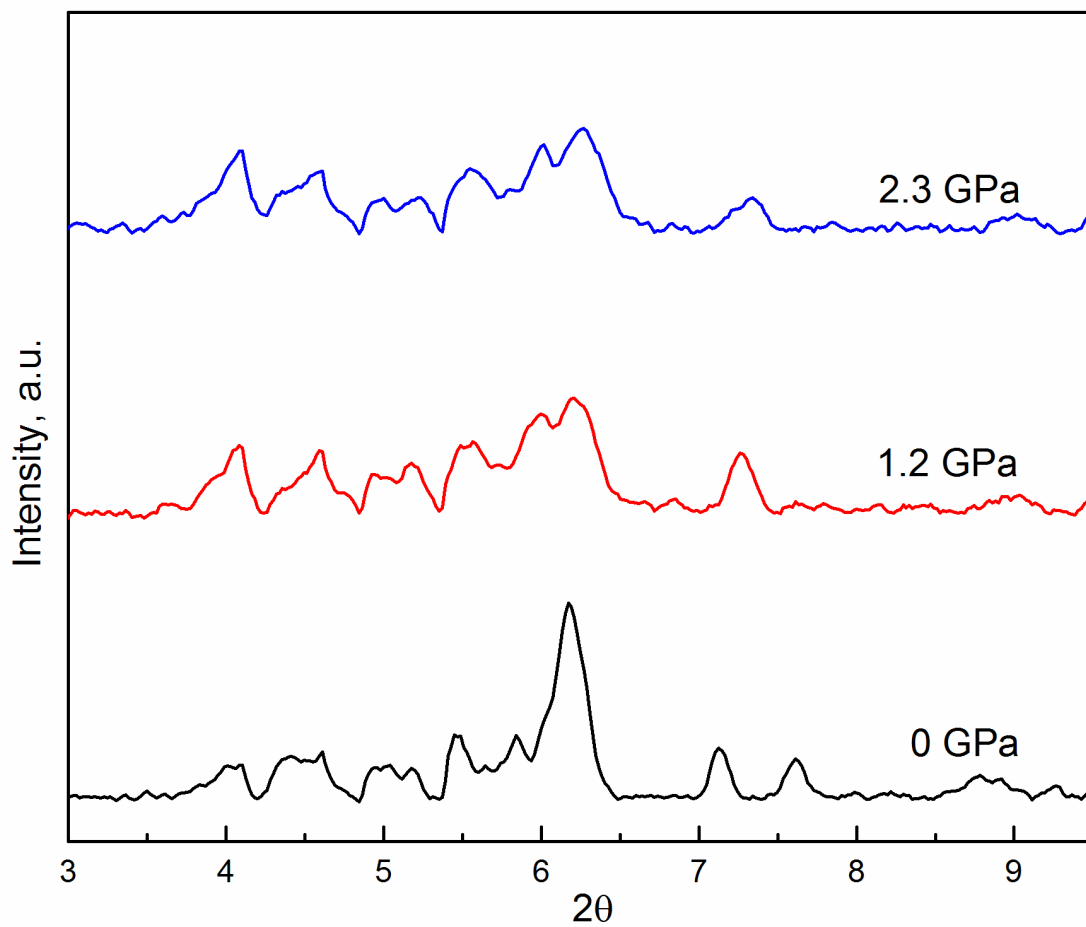

**Figure S2.** XRD patterns of cesium oxalate ( $\text{Cs}_2\text{C}_2\text{O}_4$ ) at ambient pressure, 1.2 GPa and 2.3 GPa after 60 min of X-ray irradiation at 36 keV.

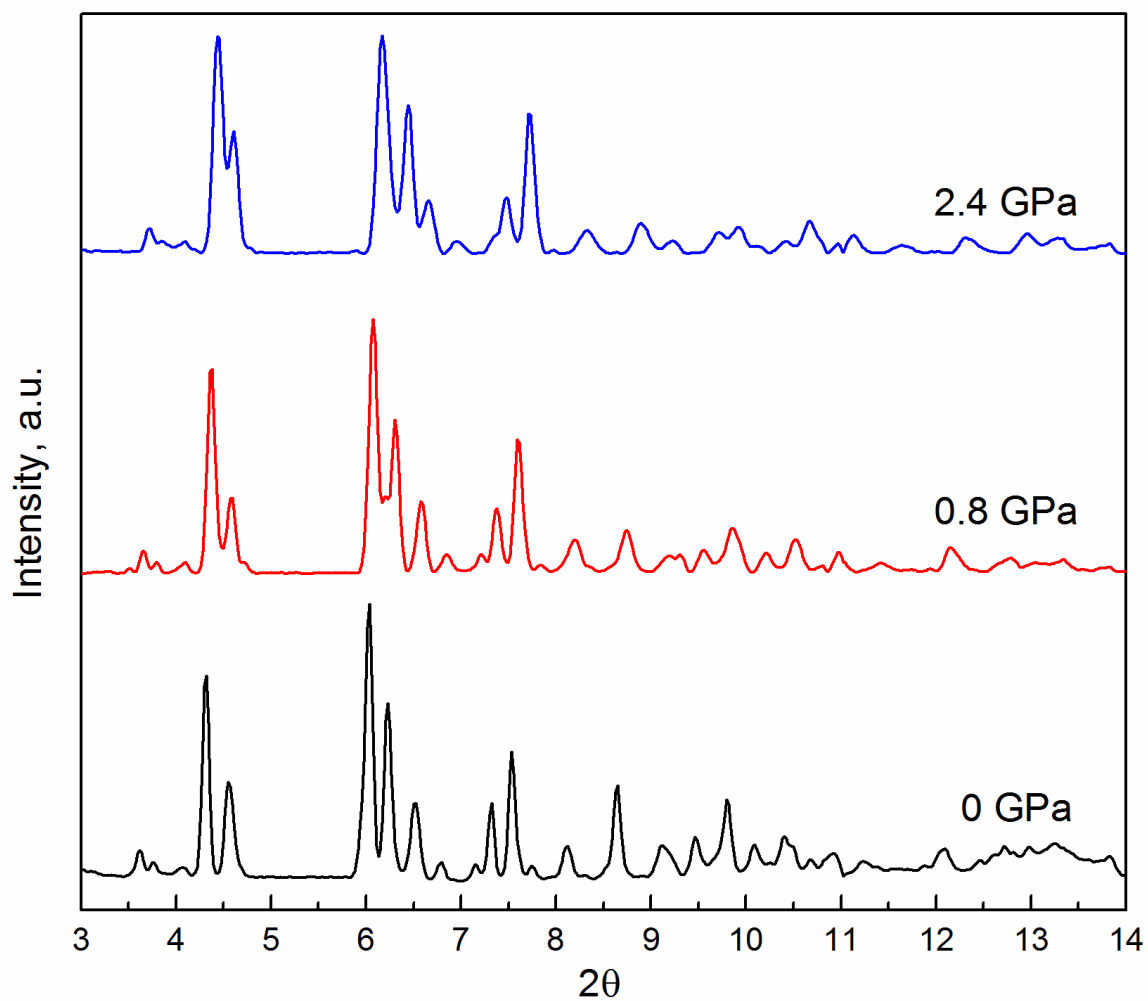

**Figure S3.** XRD patterns of cesium oxalate monohydrate ( $\text{Cs}_2\text{C}_2\text{H}_2\text{O}_5$ ) at ambient pressure, 0.8 GPa and 2.4 GPa after 1 min of X-ray irradiation at 36 keV.

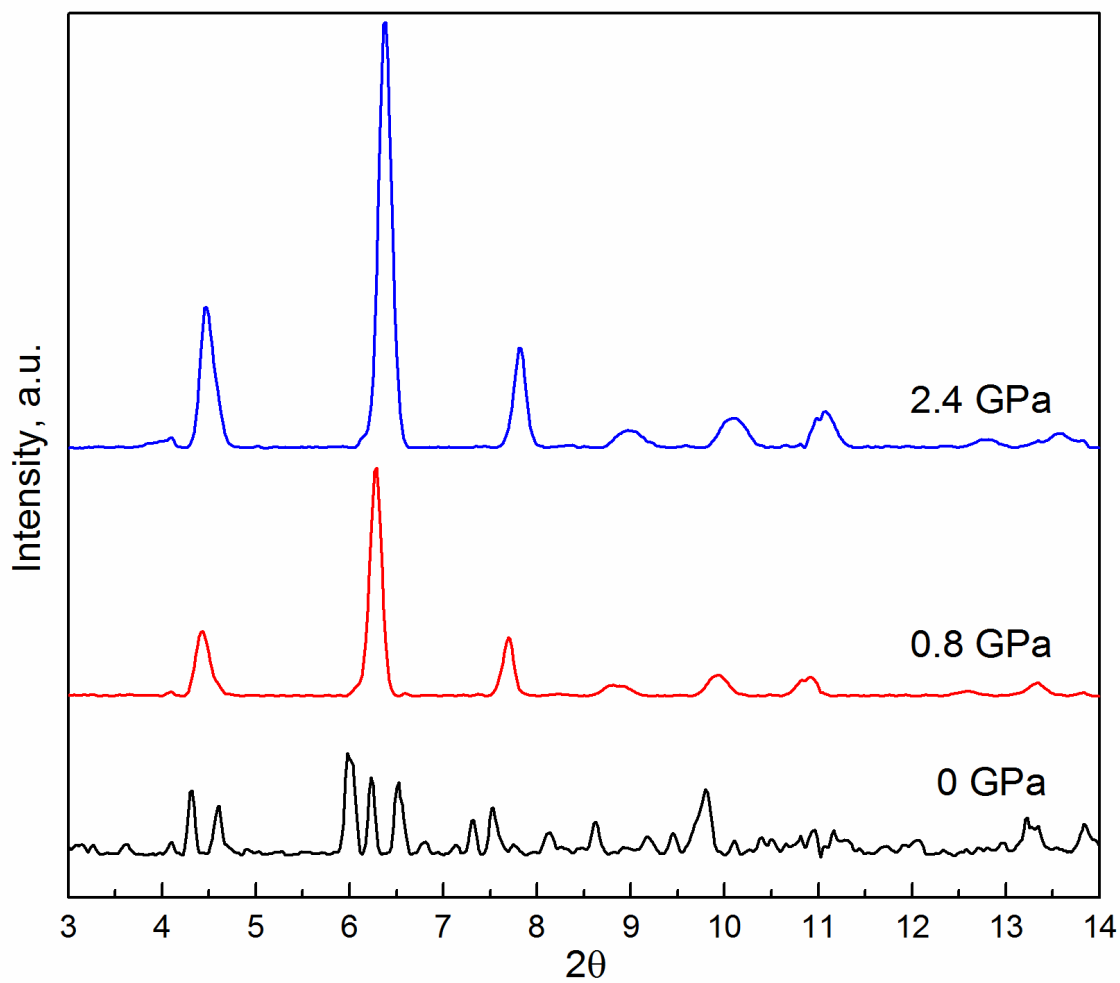

**Figure S4.** XRD patterns of cesium oxalate monohydrate ( $\text{Cs}_2\text{C}_2\text{H}_2\text{O}_5$ ) at ambient pressure, 0.8 GPa and 2.4 GPa after 60 min of X-ray irradiation at 36 keV.

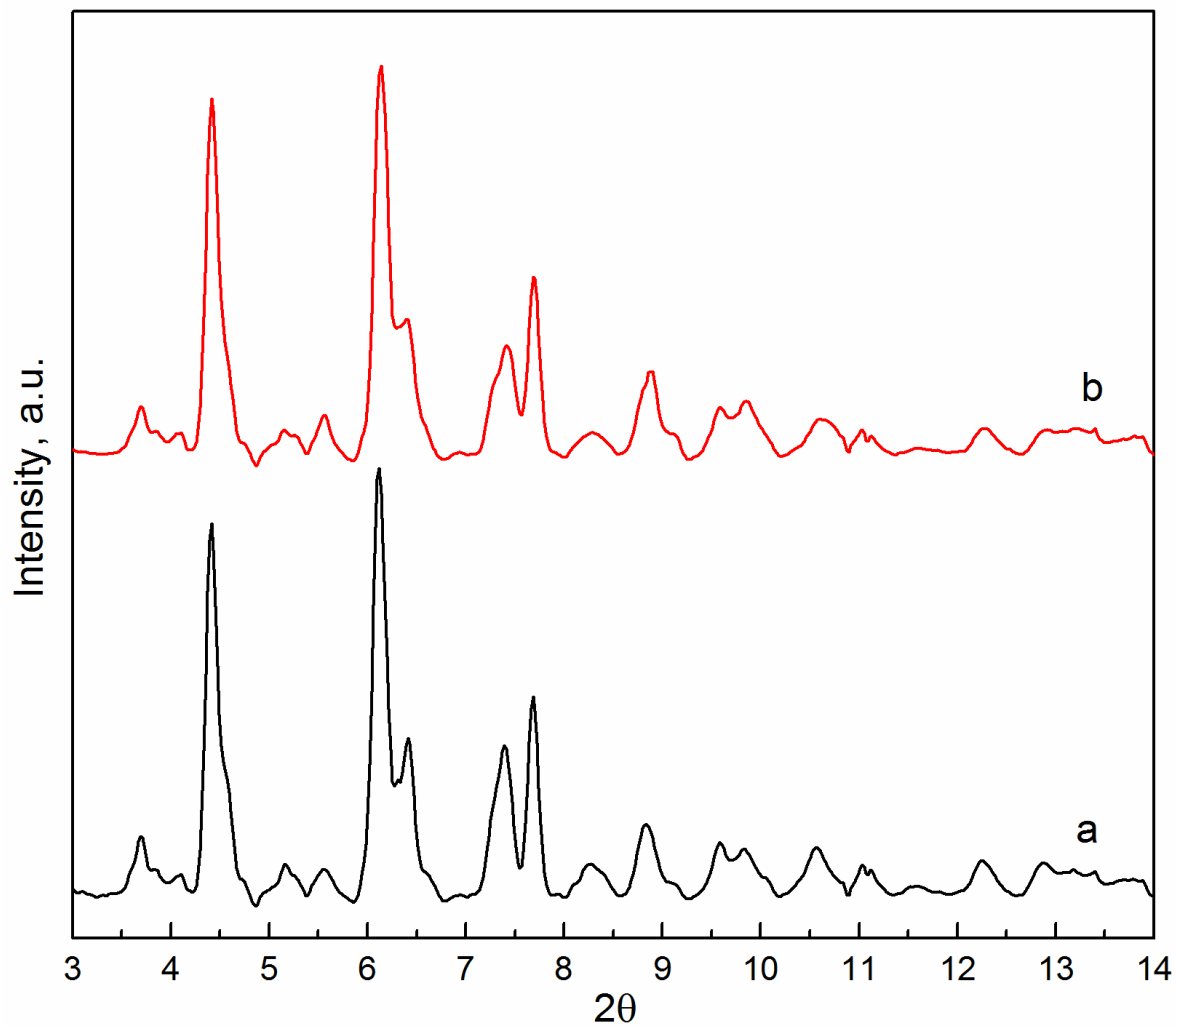

**Figure S5.** XRD patterns of cesium oxalate monohydrate ( $\text{Cs}_2\text{C}_2\text{H}_2\text{O}_5$ ) at 2 GPa: (a) after 1 min of X-ray irradiation at 36 keV and (b) after following 60 min without X-ray irradiation.

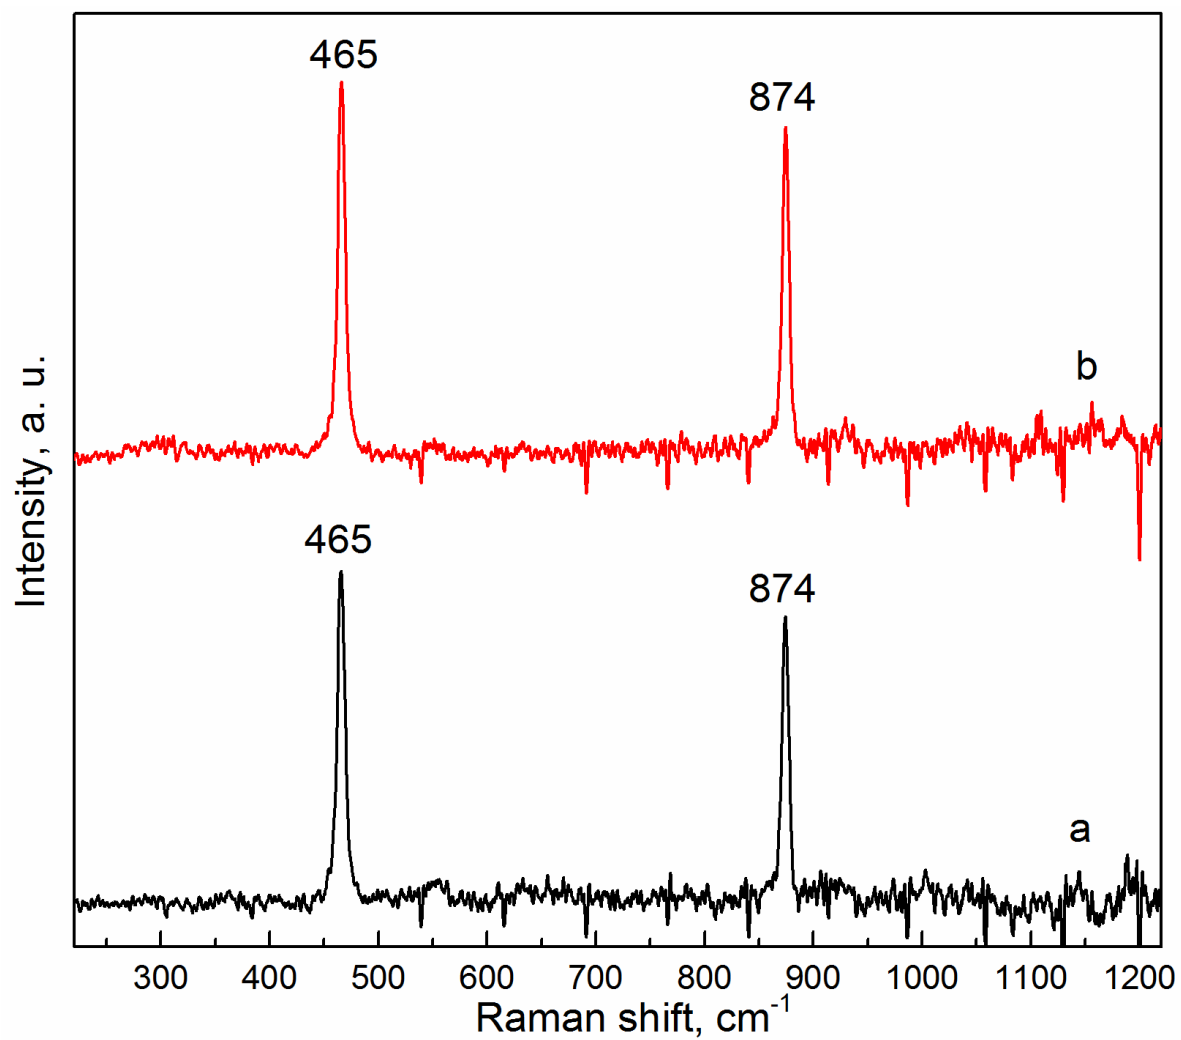

**Figure S6.** Raman spectra of cesium oxalate monohydrate ( $\text{Cs}_2\text{C}_2\text{H}_2\text{O}_5$ ) at 2 GPa: (a) initially loaded sample in a DAC and (b) after following 60 min under pressure.
